# Supplementary material for: Metagenomic study of acanthamoeba endosymbionts in recreational waters: role in ocular and systemic infections
Source: Research Square preprint supplement (doi:10.21203/rs.3.rs-7554315/v1), 2025-12-03
Supplement: Supplementary file 1 [file 908ce1d8b8940b7aa3bb1fa2.pdf]

**Supplementary Table S1** Unique *Acanthamoeba* endosymbiont species count per week for each source

| Source                                | Week 1 | Week 2 | Week 3 |
|---------------------------------------|--------|--------|--------|
| 1st Street Beach                      | 2      | 0      | 9      |
| 53rd Street Beach                     | 1      | 4      | 8      |
| Key Biscayne Beach Club               | 1      | 7      | 13     |
| Key Biscayne Crandon Park South       | 7      | 16     | 19     |
| Little River Pocket Park              | 7      | 6      | 30     |
| Parkview Kayak Launch                 | 4      | 13     | 19     |
| Purdy Kayak Launch, Maurice Gibb Park | 13     | 2      | 22     |
| Surfside 93rd Street Beach            | 3      | 4      | 5      |

**Supplementary Table S2** Distribution of associated diseases by source

| Source                                      | Endophthalmitis | Eye<br>Infection | Gastrointestinal | Human<br>Feces | Keratitis | Respiratory | Skin |
|---------------------------------------------|-----------------|------------------|------------------|----------------|-----------|-------------|------|
| 1st Street<br>Beach                         | 6               | 7                | 5                | 6              | 7         | 6           | 7    |
| 53 <sup>rd</sup><br>Street<br>Beach         | 6               | 8                | 5                | 7              | 8         | 7           | 8    |
| Key<br>Biscayne<br>Beach<br>Club            | 9               | 10               | 5                | 9              | 9         | 10          | 10   |
| Key<br>Biscayne<br>Crandon<br>Park<br>South | 15              | 18               | 12               | 14             | 16        | 13          | 17   |
| Little<br>River<br>Pocket<br>Park           | 16              | 19               | 10               | 14             | 16        | 14          | 18   |
| Parkview<br>Kayak<br>Launch                 | 15              | 16               | 9                | 13             | 16        | 10          | 15   |
| Purdy<br>Kayak                              | 14              | 16               | 9                | 12             | 15        | 14          | 17   |

|                                     |   |   |   |   |   |   |   |
|-------------------------------------|---|---|---|---|---|---|---|
| Launch,<br>Maurice<br>Gibb<br>Park  |   |   |   |   |   |   |   |
| Surfside<br>93rd<br>Street<br>Beach | 3 | 4 | 4 | 4 | 4 | 5 | 4 |
